# Supplementary material
Source: publisher site journal article supplement (https://www.dovepress.com/article/539055)
Supplement: Supplementary file 1 [file 539055%20Supplemental%20Table%201_1.docx]

**Supplementary Materials**

Supplemental Table 1: Sensitivity test results for the flagged population

|  |  | **Flagged Population** | | | | | |
| --- | --- | --- | --- | --- | --- | --- | --- |
|  |  |  |  | **Severe Exacerbations** | | **Moderate Exacerbations** | |
|  |  | **Total Patient Years** | **Death counts** | **Counts** | **Cost, €** | **Counts** | **Cost, €** |
| **Status Quo** | **Base Assumptions** | 7.60M | 574.09K | 825.99K | 9.97B | 5.49M | 1.08B |
| **10% Lower GOLD Stage** | 7.28M | 548.53K | 781.53K | 9.44B | 5.24M | 1.03B |
| **10% Higher GOLD Stage** | 8.01M | 610.52K | 905.35K | 10.92B | 5.84M | 1.15B |
| **10% Lower Exacerbation Rate** | 7.35M | 539.70K | 728.38K | 8.79B | 4.82M | 946.38M |
| **10% Higher Exacerbation Rate** | 7.85M | 607.37K | 927.37K | 11.19B | 6.18M | 1.22B |
| **COPD Population Growth -1%** | 7.33M | 556.05K | 799.17K | 9.63B | 5.28M | 1.03B |
| **COPD Population Growth +1%** | 7.91M | 592.41K | 855.84K | 10.34B | 5.74M | 1.13B |
| **Increased SITT** | **Base Assumptions** | 7.77M | 535.06K | 760.29K | 9.19B | 4.98M | 980.74M |
| **10% Lower GOLD Stage** | 7.43M | 511.59K | 716.64K | 8.67B | 4.76M | 936.96M |
| **10% Higher GOLD Stage** | 8.20M | 570.49K | 831.67K | 10.05B | 5.31M | 1.04B |
| **10% Lower Exacerbation Rate** | 7.50M | 503.37K | 666.56K | 8.06B | 4.37M | 858.83M |
| **10% Higher Exacerbation Rate** | 8.03M | 565.83K | 852.56K | 10.31B | 5.63M | 1.11B |
| **COPD Population Growth -1%** | 7.50M | 520.53K | 734.51K | 8.87B | 4.80M | 944.24M |
| **COPD Population Growth +1%** | 8.09M | 552.22K | 787.16K | 9.53B | 5.22M | 1.03B |
